# Supplementary material for: The Role of Prep1 in the Regulation of Mesenchymal Stromal Cells
Source: MDPI journal article supplement (doi:10.3390/ijms20153639), 2019-07-25
Supplement: s1 [file s1]

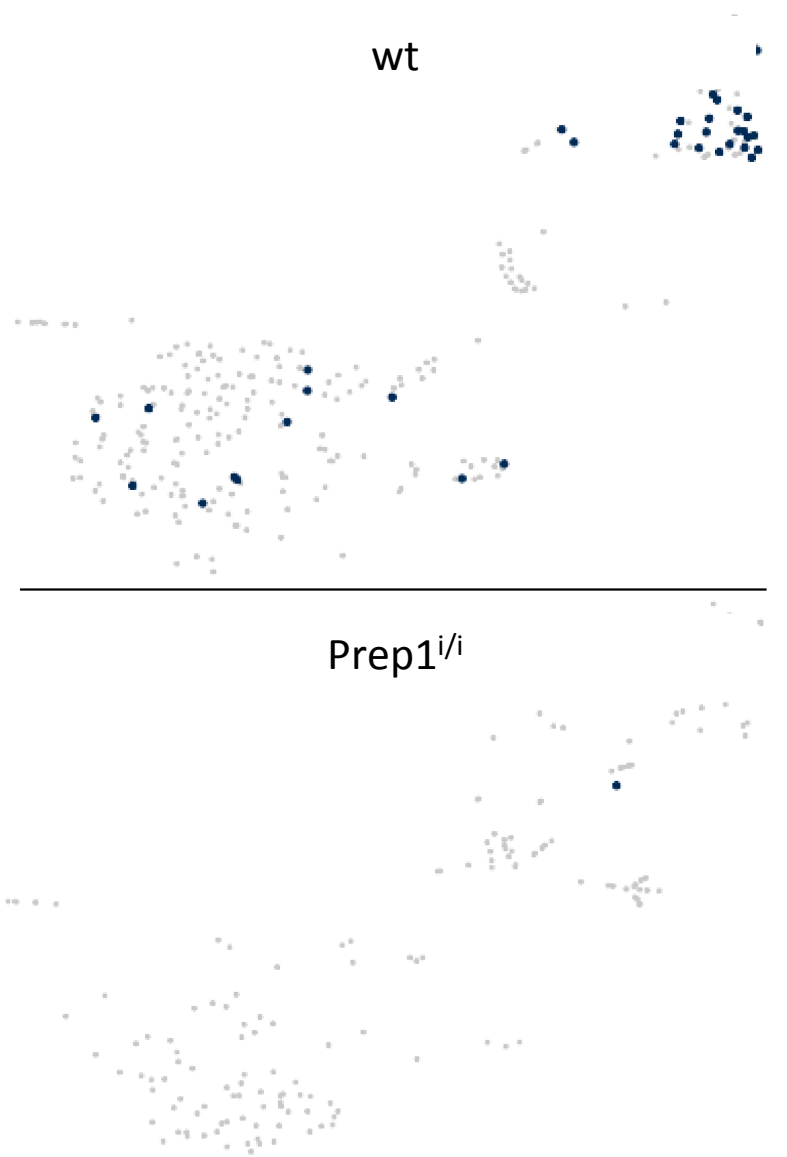

**Supplementary Figure S1.** Prep1 expression distribution. t-SNE plot shows that Prep1 is mainly expressed in wt cluster 2 and, as expected, it is almost undetectable in the hypomorphic sample.
